|                                                                                                                                     |      |
|-------------------------------------------------------------------------------------------------------------------------------------|------|
| <b>Introduction</b>                                                                                                                 | i1   |
| by Nicholas Dimsdale and Mark Thomas                                                                                                |      |
| <b>War and welfare: Britain, France, and the United States 1807–14</b>                                                              | i8   |
| by Kevin H. O'Rourke                                                                                                                |      |
| <b>The markup for lemons: quality and uncertainty in American and British used-car markets c. 1953–73</b>                           | i31  |
| by Avner Offer                                                                                                                      |      |
| <b>Promotion tournaments and white collar careers: evidence from Williams Deacon's Bank, 1890–1941</b>                              | i49  |
| by Andrew J. Seltzer and Jeff Frank                                                                                                 |      |
| <b>Understanding financial derivatives during the South Sea Bubble: the case of the South Sea subscription shares</b>               | i73  |
| by Gary S. Shea                                                                                                                     |      |
| <b>What made southwest German firms innovative around 1900? Assessing the importance of intra- and inter-industry externalities</b> | i105 |
| by Jörg Baten, Anna Spadavecchia, Jochen Streb and Shuxi Yin                                                                        |      |
| <b>Globalization, natural resources, and foreign investment: a view from the resource-rich tropics</b>                              | i127 |
| by Gregg Huff                                                                                                                       |      |
| <b>Labour market integration in a pre-industrial economy: Catalonia, 1772–1816</b>                                                  | i156 |
| by Natalia Mora-Sitja                                                                                                               |      |
